# Supplementary material for: An Unusual Splice Defect in the Mitofusin 2 Gene (MFN2) Is Associated with Degenerative Axonopathy in Tyrolean Grey Cattle
Source: PLoS One. 2011 Apr 15;6(4):e18931. doi: 10.1371/journal.pone.0018931 (PMC3078137; doi:10.1371/journal.pone.0018931)
Supplement: Table S1 — Polymorphisms and genotypes of 8 Tyrolean Grey cattle in the region of the MFN2 gene. (XLSX) [file pone.0018931.s006.xlsx]

## Sheet: Polymorphisms
Btau 4 pos	reference allele	mutant allele	genomic pos	cDNA pos	Protein	Position in gene	TG03	TG06	TG14	TG19	TG26	TG20	TG35	TG38	Perfect association	Comment
							aff.	aff.	aff.	carrier	carrier	free	free	free
38424285	C	A	g.37002G>T			3'-flanking	AA	AA	AA	AA	AC	AA	AC	AC	no
38424537_8	AT	del	g.36749_36750delAT			3'-flanking	II	II	II	II	II	ID	II	II	no
38425037	G	A	g.36250C>T			3'-flanking	AA	AA	AA	AA	AG	AG	AG	AG	no
38426239	C	T	g.35048G>A	c.*1763G>A		exon 20, 3'-UTR	TT	TT	TT	TT	CT	CT	CT	CT	no
38426437	C	T	g.34850G>A	c.*1565G>A		exon 20, 3'-UTR	TT	TT	TT	TT	CT	CT	CT	CT	no
38426450	G	A	g.34837C>T	c.*1552C>T		exon 20, 3'-UTR	AA	AA	AA	AA	AG	AG	AG	AG	no
38427260	T	C	g.34027A>G	c.*742A>G		exon 20, 3'-UTR	CC	CC	CC	CC	CT	CT	CT	CT	no
38428047	G	A	g.33230C>T	c.2229C>T	silent	exon 20	AA	AA	AA	AG	AG	GG	GG	GG	yes	c.2229C>T is a synonymous transition within codon 743. However, it leads to partial aberrant splicing with an effect on the protein (p.N736X)
38428134	A	G	g.33153T>G	c.2204+1143T>C		intron 19	GG	GG	GG	GG	AG	AG	AG	AG	no
38428363	T	C	g.32924A>G	c.2204+914A>G		intron 19	CC	CC	CC	CC	CT	CC	CT	CT	no
38428492	C	T	g.32795G>A	c.2204+785G>A		intron 19	TT	TT	TT	TT	CT	CT	CT	CT	no
38428552	T	G	g.32735A>C	c.2204+725A>C		intron 19	GG	GG	GG	GG	GT	GT	GT	GT	no
38429595	G	A	g.31692C>T	c.2069+849C>T		intron 18	AA	AA	AA	AA	..	AG	AG	AG	no
38430083	T	C	g.31204A>G	c.2069+361A>G		intron 18	CC	CC	CC	CC	CT	CT	CT	CT	no
38430207	G	A	g.31080C>T	c.2069+237C>T		intron 18	AA	AA	AA	AA	AG	AG	AG	AG	no
38430373	G	A	g.30914C>T	c.2069+71C>T		intron 18	AA	AA	AA	AA	AG	AG	AG	AG	no
38430889	C	G	g.30388G>C	c.1872+1191G>C		intron 17	GG	GG	..	GG	..	CG	CG	CG	no
38430924	G	del	g.30363delC	c.1872+1166delC		intron 17	DD	DD	..	DD	..	DI	DI	DI	no
38431356	C	T	g.29931G>A	c.1872+734G>A		intron 17	TT	TT	..	TT	..	CT	..	CT	no
38432195	C	A	g.29092G>T	c.1767G>T	silent	exon 17	AA	AA	AA	AA	AC	AC	AC	AC	no
38434958	G	A	g.26329C>T	c.1160+1227C>T		intron 12	AA	AA	AA	AA	AG	AG	AG	AG	no
38435465	A	G	g.25822T>C	c.1160+720T>C		intron 12	GG	GG	GG	GG	AG	AG	AG	AG	no
38435709	C	T	g.25578G>A	c.1160+476G>A		intron 12	TT	TT	TT	TT	CT	CT	CT	CT	no
38435746	C	G	g.25541G>C	c.1160+439G>C		intron 12	GG	GG	GG	GG	CG	CG	CG	CG	no
38435895	C	T	g.25392G>A	c.1160+290G>A		intron 12	TT	TT	TT	TT	CT	CT	CT	CT	no
38435936	G	A	g.25351C>T	c.1160+249C>T		intron 12	AA	AA	AA	AA	AG	AG	AG	AG	no
38436050	A	G	g.25237T>C	c.1160+135T>C		intron 12	GG	GG	GG	GG	AG	AG	AG	AG	no
38436089	G	C	g.25198C>G	c.1160+96C>G		intron 12	CC	CC	CC	CC	CG	CG	CG	CG	no
38436202	G	A	g.25085C>T	c.1143C>T	silent	exon 12	AA	AA	AA	AA	AG	AG	AG	AG	no
38436323	A	G	g.24964T>C	c.1038+126T>C		intron 11	GG	GG	GG	GG	AG	AG	AG	AG	no
38436397	C	T	g.24890G>A	c.1038+52G>A		intron 11	TT	TT	TT	TT	CT	CT	CT	CT	no
38436512	G	A	g.24775C>T	c.975C>T	silent	exon 11	AA	AA	AA	AA	AG	AG	AG	AG	no
38436593	C	T	g.24694G>A	c.970+93G>A		intron 10	TT	TT	TT	TT	CT	CT	CT	CT	no
38436673	G	A	g.24614C>T	c.970+13C>T		intron 10	AA	AA	AA	AA	AG	AG	AG	AG	no
38437205	C	G	g.24082G>C	c.816+981G>C		intron 9	GG	GG	GG	GG	..	CG	CG	CG	no
38437266	G	del	g.24021delC	c.816+920delC		intron 9	DD	DD	DD	DD	..	DI	DI	DI	no
38437324	(A)9	(A)10	g.23954T(9_10)	c.816+854T(9_10)		intron 9	10/10	10/10	10/10	10/10	..	..	..	..	no
38437480	C	T	g.23806G>A	c.816+706G>A		intron 9	TT	TT	TT	TT	..	..	..	..	no
38437708	G	T	g.23578C>A	c.816+478C>A		intron 9	TT	TT	TT	TT	GT	GT	GT	GT	no
38437926	T	G	g.23360A>C	c.816+260A>C		intron 9	GG	GG	GG	GG	GT	GT	GT	GT	no
38437983	(A)18	(A)9-10	g.23293T(9_18)	c.816+186T(9_18)		intron 9	10/10	10/10	9/10	10/10	9/10	9/10	9/10	9/10	no
38438048	G	T	g.23245C>A	c.816+138C>A		intron 9	TT	TT	TT	TT	GT	GT	GT	GT	no
38438147	G	del	g.23147C(4)	c.816+36C(4)		intron 9	DD	DD	DD	DD	DD	DD	DD	DD	no
38438343	T	C	g.22951A>G	c.708+63A>G		intron 8	CC	CC	CC	CC	CT	CC	CT	CT	no
38438757	G	A	g.22537C>T	c.599+697C>T		intron 7	AA	AA	AA	AA	AG	AG	AG	AG	no
38438780	C	T	g.22514G>A	c.599+674G>A		intron 7	TT	TT	TT	TT	CT	CT	CT	CT	no
38438823	A	C	g.22471T>G	c.599+631T>G		intron 7	CC	CC	CC	CC	AC	AC	AC	AC	no
38438841	G	A	g.22453C>T	c.599+613C>T		intron 7	AA	AA	AA	AA	AG	AG	AG	AG	no
38438900	C	T	g.22394G>A	c.599+554G>A		intron 7	TT	TT	TT	TT	CT	CT	CT	CT	no
38438910	A	G	g.22384T>C	c.599+544T>C		intron 7	GG	GG	GG	GG	AG	AG	AG	AG	no
38439021	C	T	g.22273G>A	c.599+433G>A		intron 7	TT	TT	TT	TT	CT	CT	CT	CT	no
38439170	C	G	g.22124G>C	c.599+284G>C		intron 7	GG	GG	GG	GG	CG	CG	CG	CG	no
38439326	T	G	g.21968A>C	c.599+128A>C		intron 7	GG	GG	GG	GG	GT	GT	GT	GT	no
38439418	C	T	g.21876G>A	c.599+36G>A		intron 7	TT	TT	TT	TT	CT	CT	CT	CT	no
38440553	T	C	g.20754A>G	c.311+2691A>G		intron 5	CC	CC	CC	CC	CT	CT	CT	CT	no
38440735	C	T	g.20585G>A	c.311+2509G>A		intron 5	TT	TT	TT	TT	CT	CT	CT	CT	no
38440958	A	G	g.20362T>C	c.311+2286T>C		intron 5	GG	GG	GG	GG	AG	AG	AG	AG	no
38441160	(T)7	(T)8	g.20153A(7_8)	c.311+2078A(7_8)		intron 5	II	II	II	II	..	ID	..	..	no
38441914	C	A	g.19405G>T	c.311+1330G>T		intron 5	AA	AA	AA	AA	AC	AC	AC	AC	no
38442001	G	A	g.19318C>T	c.311+1243C>T		intron 5	AA	AA	AA	AA	AG	AG	AG	AG	no
38442118_9	(AC)	(AC)2	g.19200_19201dupGT	c.311+1125_1126dupGT		intron 5	II	II	II	II	DD	DD	DD	DD	no
38442415	(A)30	(A)20-35	g.18875T(20_35)	c.311+800T(20_35)		intron 5	..	..	..	..	..	..	..	..	???
38442590	A	G	g.18729T>C	c.311+654T>C		intron 5	GG	GG	GG	GG	..	AA	AA	..	no
38442694	A	G	g.18625T>C	c.311+550T>C		intron 5	GG	GG	GG	GG	AG	GG	AG	AG	no
38442706	A	G	g.18613T>C	c.311+538T>C		intron 5	GG	GG	GG	GG	AG	AA	AG	AG	no
38442726	G	A	g.18593C>T	c.311+518C>T		intron 5	AA	AA	AA	AA	AG	GG	AG	AG	no
38442997	G	del	g.18322delC	c.311+246delC		intron 5	DD	DD	DD	DD	DI	II	DI	DI	no
38443012	A	G	g.18307T>C	c.311+232T>C		intron 5	GG	GG	GG	GG	AG	AA	AG	AG	no
38443188	A	G	g.18131T>C	c.311+56T>C		intron 5	GG	GG	GG	GG	AG	AG	AG	AG	no
38443221	A	G	g.18098T>C	c.311+23T>C		intron 5	GG	GG	GG	GG	AG	AG	AG	AG	no
38443453	A	G	g.17866T>C	c.175+3537T>C		intron 4	GG	GG	GG	GG	AG	AG	AG	AG	no
38443551	T	C	g.17768A>G	c.175+3439A>G		intron 4	CC	CC	CC	CC	..	CT	CT	CT	no
38443579	C	T	g.17740G>A	c.175+3411G>A		intron 4	TT	TT	TT	TT	..	CT	CT	CT	no
38443728	A	G	g.17591T>C	c.175+3262T>C		intron 4	GG	GG	GG	GG	AG	AG	AG	AG	no
38443805	C	T	g.17514G>A	c.175+3185G>A		intron 4	CC	CC	CC	CC	CC	CT	CC	CC	no
38443922	T	C	g.17397A>G	c.175+3068A>G		intron 4	CC	CC	CC	CC	CT	CT	CT	CT	no
38444392	T	C	g.16927A>G	c.175+2598A>G		intron 4	CC	CC	CC	CC	CT	CT	CT	CT	no
38444394	T	C	g.16925A>G	c.175+2596A>G		intron 4	CC	CC	CC	CC	CT	CT	CT	CT	no
38444399	G	A	g.16920C>T	c.175+2591C>T		intron 4	AA	AA	AA	AA	AG	AG	AG	AG	no
38444429	A	G	g.16890T>C	c.175+2561T>C		intron 4	GG	GG	GG	GG	AG	AG	AG	AG	no
38444662	T	G	g.16657A>G	c.175+2328A>C		intron 4	GG	GG	GG	GG	GT	GT	GT	GT	no
38444916	T	C	g.16403A>G	c.175+2074A>G		intron 4	CC	CC	CC	CC	CT	CT	CT	CT	no
38445047	A	C	g.16272T>G	c.175+1943T>G		intron 4	CC	CC	CC	CC	AC	AC	AC	AC	no
38445237	A	G	g.16082T>C	c.175+1753T>C		intron 4	GG	GG	GG	GG	..	AG	AG	AG	no
38445291	A	T	g.16028T>A	c.175+1699T>A		intron 4	TT	TT	TT	TT	..	AT	AT	AT	no
38445361	C	G	g.15958G>C	c.175+1629G>C		intron 4	GG	GG	GG	GG	..	CG	CG	CG	no
38445457	C	T	g.15862G>A	c.175+1533G>A		intron 4	TT	TT	TT	TT	..	CT	CT	CT	no
38445733	C	T	g.15586G>A	c.175+1257G>A		intron 4	TT	TT	TT	TT	CT	CT	CT	CT	no
38445930	C	G	g.15389G>C	c.175+1060G>C		intron 4	GG	GG	GG	GG	CG	CG	CG	CG	no
38446000_26	27bp	del	g.15294_15320del27	c.175+964_990del27		intron 4	DD	DD	DD	DD	ID	ID	ID	ID	no
38446028	G	C	g.15291C>G	c.175+962C>G		intron 4	CC	CC	CC	CC	CG	CG	..	..	no
38446503	G	A	g.14816C>T	c.175+487C>T		intron 4	AA	AA	AA	AA	AG	AG	AG	AG	no
38446567	G	A	g.14752C>T	c.175+423C>T		intron 4	AA	AA	AA	AA	AG	AG	AG	AG	no
38446574	G	C	g.14745C>G	c.175+416C>G		intron 4	CC	CC	CC	CC	CG	CG	CG	CG	no
38446696	G	A	g.14623C>T	c.175+294C>T		intron 4	AA	AA	AA	AA	AG	AG	AG	AG	no
38447249	T	C	g.14070A>G	c.-5+4210A>G		intron 3	CC	CC	CC	CC	CT	CT	CT	CT	no
38447479	T	C	g.13840A>G	c.-5+3980A>G		intron 3	CC	CC	CC	CC	CT	CT	CT	CT	no
38447719	G	A	g.13600C>T	c.-5+3740C>T		intron 3	AA	AA	AA	AA	AG	AG	AG	AG	no
38448292	C	G	g.13027G>C	c.-5+3167G>C		intron 3	GG	GG	GG	GG	CG	CG	CG	CG	no
38448322	T	C	g.12997G>T	c.-5+3137A>G		intron 3	CC	CC	CC	CC	CT	CT	CT	CT	no
38448324	C	A	g.12995G>T	c.-5+3135G>T		intron 3	AA	AA	AA	AA	AC	AC	AC	AC	no
38448635	G	A	g.12684C>T	c.-5+2824C>T		intron 3	AA	AA	AA	AA	AG	AG	AG	AG	no
38449814	C	T	g.11505G>A	c.-5+1645G>A		intron 3	CC	CC	CC	CC	CC	CT	CC	CC	no
38449918	A	T	g.11401T>A	c.-5+1541T>A		intron 3	TT	TT	TT	AT	AT	AT	AA	AA	(no)	Exclusion based on the fact that TG20, which is assumed to be free of the mutation, carries oe copy of the mutant allele
38450407	T	C	g.10912A>G	c.-5+1052A>G		intron 3	CC	CC	CC	CC	CT	CT	CT	CT	no
38450812	T	C	g.10507A>G	c.-5+647A>G		intron 3	CC	CC	CC	CC	CT	CT	CC	CT	no
38450883_4	GA	AC	g.10435_10436TC>GT	c.-5+575_576TC>GT		intron 3	AC/AC	AC/AC	AC/AC	AC/GA	AC/GA	AC/GA	AC/GA	AC/GA	no
38450938	G	A	g.10381C>T	c.-5+521C>T		intron 3	AA	AA	AA	AG	AG	AG	AG	AG	no
38450957	G	A	g.10362C>T	c.-5+502C>T		intron 3	GG	GG	GG	AG	AG	AG	AG	AG	no
38451644	G	A	g.9675C>T	c.-90+292C>T		intron 2	AA	AA	AA	AA	AG	AG	AG	AG	no
38451859	T	C	g.9460A>G	c.-90+77A>G		intron 2	CC	CC	CC	CC	CT	CT	CT	CT	no
38452060	G	A	g.9259C>T	c.-214C>T		exon 2, 5'-UTR	AA	AA	AA	AA	AG	AG	AG	AG	no
38452305	A	G	g.9014T>C	c.-229+1034T>C		intron 1	AA	AA	AA	AA	AG	AG	AG	AG	no
38452573	T	C	g.8746A>G	c.-229+766A>G		intron 1	TT	TT	TT	TT	CT	CT	CT	CT	no
38452659	T	C	g.8660A>G	c.-229+680A>G		intron 1	TT	TT	TT	TT	CT	CT	CT	CT	no
38452797	(GT)6	(GT)7	g.8510CA(6_7)	c.-229+530CA(6_7)		intron 1	66	66	66	66	67	67	67	67	no
38453037	A	G	g.8282T>C	c.-229+302T>C		intron 1	GG	GG	GG	GG	AG	AG	AG	AG	no
38453180	A	G	g.8139T>C	c.-229+159T>C		intron 1	GG	GG	GG	GG	AG	AG	AG	AG	no
38453251	A	G	g.8068T>C	c.-229+88T>C		intron 1	GG	GG	GG	GG	AG	AG	AG	AG	no
38453490	A	G	g.7829T>C			5'-flanking	GG	GG	GG	GG	AG	AG	AG	AG	no
38453626	T	C	g.7693A>G			5'-flanking	CC	CC	CC	CC	CT	CT	CT	CT	no
38453646	T	C	g.7673A>G			5'-flanking	CC	CC	CC	CC	CT	CT	CT	CT	no
38453734_8	CTCTT	del	g.7581_7584del4			5'-flanking	DD	DD	DD	DD	ID	ID	ID	ID	no
38453759_60	TC	CG	g.7559_7560GA>CG			5'-flanking	CG/CG	CG/CG	CG/CG	CG/CG	..	TC/CG	TC/CG	TC/CG	no
38454063	A	G	g.7256T>C			5'-flanking	GG	GG	GG	GG	AG	GG	AG	AG	no
38454969	T	C	g.6350A>G			5'-flanking	TT	TT	TT	TT	CT	CT	CT	CT	no
38456280	C	T	g.5039G>A			5'-flanking	CC	CC	CC	CC	CT	CT	CC	CT	no
38456336	C	T	g.4983G>A			5'-flanking	CC	CC	CC	CC	CT	CT	CC	CT	no
38456383	A	G	g.4936T>C			5'-flanking	AA	AA	AA	AA	AG	AG	AA	AG	no
38456536	T	C	g.4783A>G			5'-flanking	TT	TT	..	TT	CT	CT	..	CT	no
38456574	C	T	g.4745G>A			5'-flanking	CC	CC	..	CC	CT	CT	..	CT	no
38456814	A	G	g.4505T>C			5'-flanking	AA	AA	..	AA	AG	AG	..	AG	no
38457127	C	T	g.4192G>A			5'-flanking	CC	CC	..	..	CT	CT	..	CT	no
38457400	A	G	g.3919T>C			5'-flanking	AA	AA	AA	AA	..	..	GG	GG	no
38457444	G	A	g.3875C>T			5'-flanking	GG	GG	GG	GG	..	..	AG	AG	no
38457449	A	C	g.3870T>G			5'-flanking	CC	CC	CC	CC	..	..	AC	AC	no
38457506	G	A	g.3813C>T			5'-flanking	GG	GG	GG	GG	..	..	AG	AG	no
38457518	C	T	g.3801G>A			5'-flanking	CC	CC	CC	CC	..	..	CT	CT	no
38457628_30	GAG	del	g.3688_3690del3			5'-flanking	II	II	II	II	ID	ID	ID	ID	no
38457971	C	G	g.3348G>C			5'-flanking	GG	GG	GG	GG	CC	..	..	CC	no
38458010	G	C	g.3309C>G			5'-flanking	CC	CC	..	CC	GG	GG	..	GG	no
38458022	C	A	g.3297G>T			5'-flanking	AA	AA	..	AA	CC	CC	..	CC	no
38458137	C	G	g.3182G>C			5'-flanking	GG	GG	GG	GG	CC	CC	CC	CC	no
38458266	A	G	g.3053T>C			5'-flanking	GG	GG	..	GG	AA	AA	AA	AA	no
38458304	G	A	g.3015C>T			5'-flanking	AA	AA	..	AA	GG	GG	GG	GG	no
38458485	A	G	g.2834T>C			5'-flanking	GG	GG	..	GG	AA	AA	..	AA	no
38458489	A	T	g.2830T>A			5'-flanking	TT	TT	..	TT	AA	AA	..	AA	no
38458688	C	G	g.2631G>C			5'-flanking	CC	CC	CC	CC	CG	..	CG	CG	no
38458822	A	G	g.2497T>C			5'-flanking	GG	GG	GG	GG	AG	AG	AG	AG	no
38458850	C	A	g.2469G>T			5'-flanking	AA	AA	AA	AA	AG	AG	AG	AG	no
38458877	T	A	g.2442A>T			5'-flanking	AA	AA	AA	AA	AT	AT	AT	AT	no
38458880	T	C	g.2439A>G			5'-flanking	CC	CC	CC	CC	CT	CT	CT	CT	no
38459576	T	C	g.1743A>G			5'-flanking	TT	TT	TT	TT	CT	CT	CT	CT	no
38459709	G	C	g.1610C>G			5'-flanking	GG	GG	GG	GG	CG	CG	CG	CG	no
38459736	T	C	g.1583A>G			5'-flanking	TT	TT	TT	TT	CT	CT	CT	CT	no
38459780	G	A	g.1539C>T			5'-flanking	GG	GG	GG	GG	AG	AG	AG	AG	no
38459910	C	T	g.1409G>A			5'-flanking	TT	TT	TT	TT	CT	CT	CT	CT	no
38460065	G	A	g.1254C>T			5'-flanking	AA	AA	..	AA	AG	AG	..	AG	no
38460088	G	A	g.1231C>T			5'-flanking	AA	AA	..	AA	AG	AG	..	AG	no
38460096	T	C	g.1223A>G			5'-flanking	CC	CC	..	CC	CT	CT	..	CT	no
38460159	G	A	g.1160C>T			5'-flanking	AA	AA	AA	AA	AG	AG	AG	AG	no
38460338	C	T	g.981G>A			5'-flanking	TT	TT	TT	TT	CT	CT	CT	CT	no
38460381	T	C	g.938A>G			5'-flanking	TT	TT	TT	TT	CT	CT	CT	CT	no
38460427	A	T	g.892T>A			5'-flanking	TT	TT	TT	TT	AT	AT	AT	AT	no
38460448	T	C	g.871A>G			5'-flanking	CC	CC	CC	CC	CT	CT	CT	CT	no
38460525	A	G	g.794T>C			5'-flanking	GG	GG	GG	GG	AG	AG	AG	AG	no
38460598	A	G	g.721T>C			5'-flanking	GG	GG	GG	GG	AG	AG	..	AG	no
38460752	G	C	g.567C>G			5'-flanking	CC	CC	..	CC	CG	CG	..	CG	no
38460903	G	T	g.416C>A			5'-flanking	TT	TT	..	TT	GT	GT	..	GT	no
38460930	A	G	g.389T>C			5'-flanking	GG	GG	..	GG	AG	AG	..	AG	no
38460997	C	G	g.322G>C			5'-flanking	GG	GG	..	GG	CG	CG	..	CG	no
38461001	C	T	g.318G>A			5'-flanking	TT	TT	..	TT	CT	CT	..	CT	no
38461128	T	C	g.191A>G			5'-flanking	CC	CC	..	CC	CT	CT	..	CT	no
38461197	C	T	g.122G>A			5'-flanking	TT	TT	..	TT	CT	CT	..	CT	no
